# Supplementary material for: Berberine alleviates ox-LDL induced inflammatory factors by up-regulation of autophagy via AMPK/mTOR signaling pathway
Source: PubMed Central journal article supplement (PMC4365560; doi:10.1186/s12967-015-0450-z), 2015-03-15
Supplement: 12967_2015_450_MOESM2_ESM.pdf [file 12967_2015_450_MOESM2_ESM.pdf]

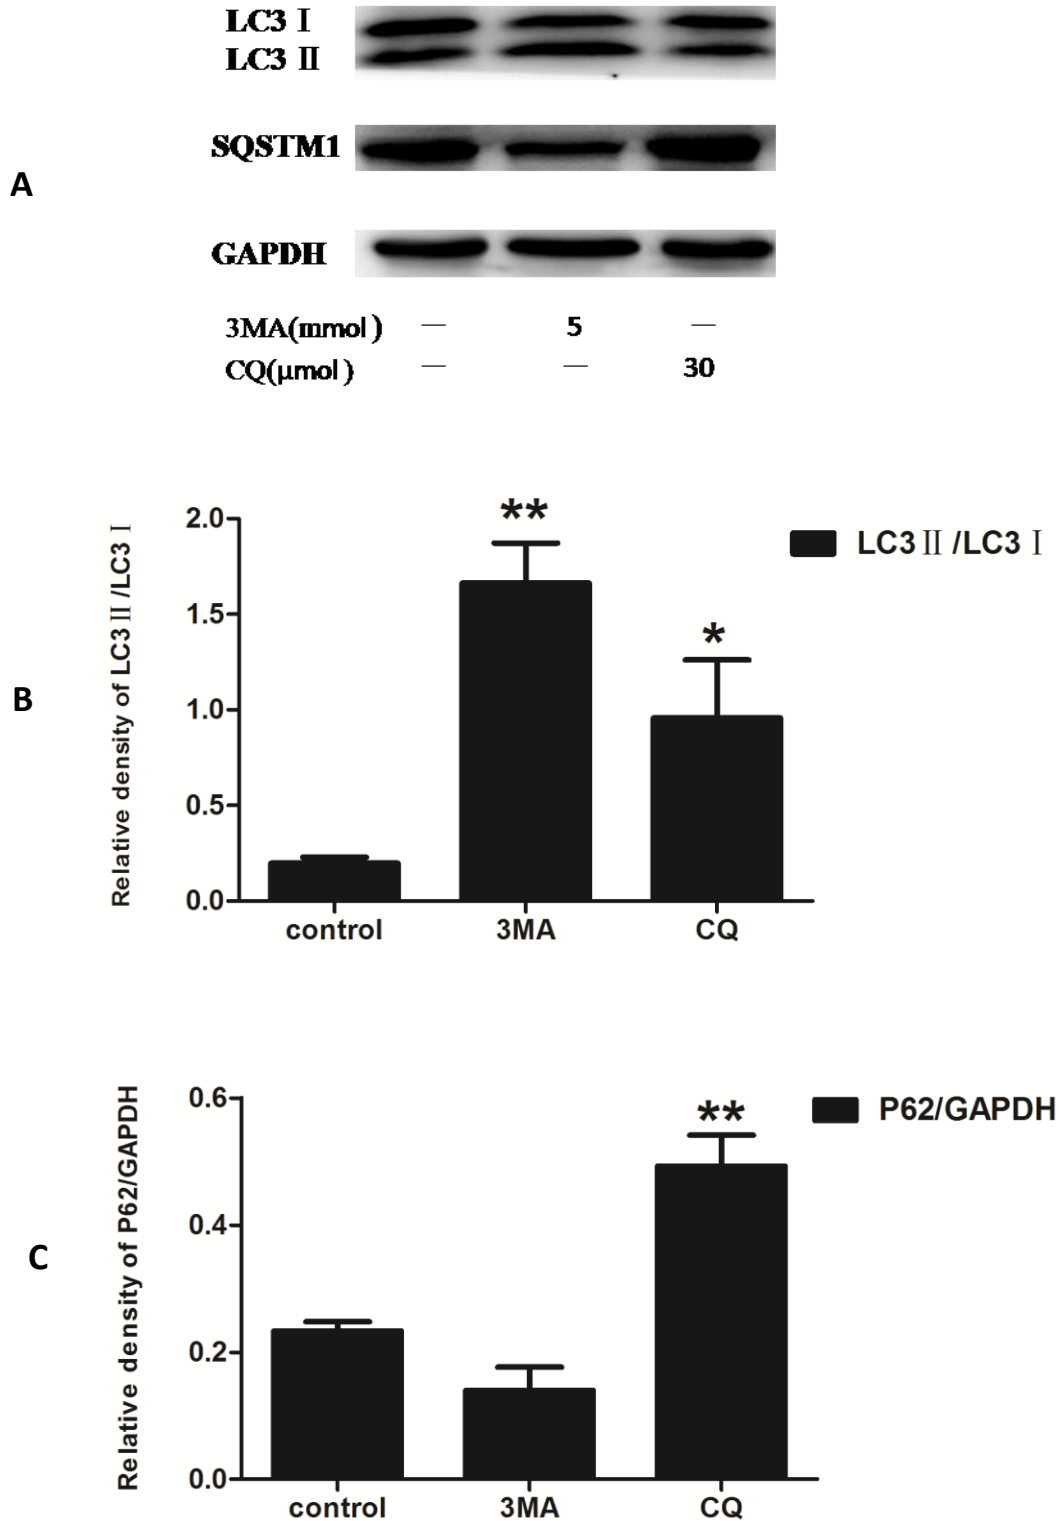

**The effect of 3-MA and CQ on J774A.1 cell lines.** (A) Representative blots of LC3 and SQSTM1/p62 in J774A.1 cells treated with 3-MA (5mmol/L) and CQ (30 μm), separately for 24h. Bar graphs showed the quantification of endogenous LC3 (B) and SQSTM1/p62 (C). Experiments were repeated at least three times. \*\*P<0.01 V.S. control group, \*P<0.05 V.S. control group; \* \*P<0.01.
