# Supplementary material for: Berberine alleviates ox-LDL induced inflammatory factors by up-regulation of autophagy via AMPK/mTOR signaling pathway
Source: PubMed Central journal article supplement (PMC4365560; doi:10.1186/s12967-015-0450-z), 2015-03-15
Supplement: 12967_2015_450_MOESM3_ESM.pdf [file 12967_2015_450_MOESM3_ESM.pdf]

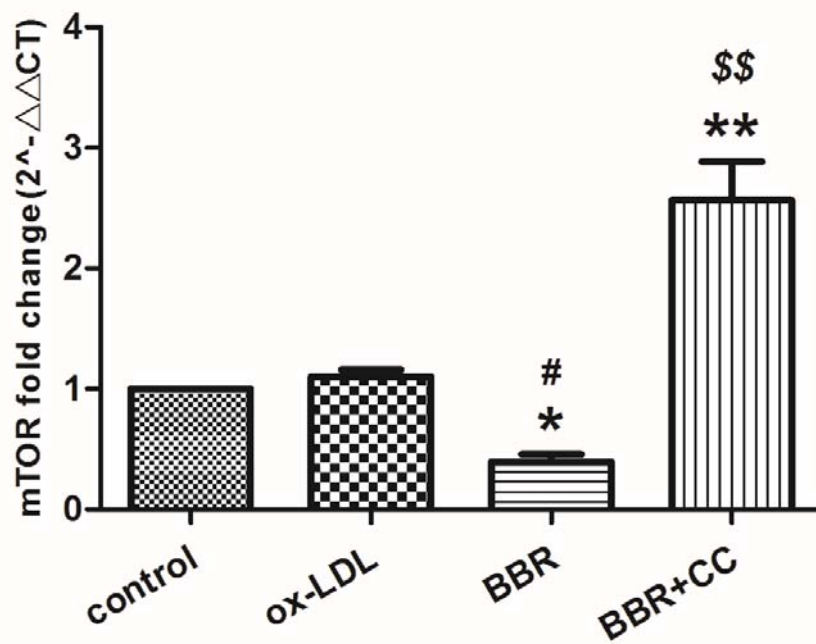

Effect of berberine on mRNA level of mTOR. Quantitative PCR analysis of mTOR mRNA levels in ox-LDL induced J774A.1 cells treated with BBR, BBR and CC for 24h. Total mRNA was isolated and mTOR mRNA was quantified by real-time PCR compared with GAPDH. The PCR primers for mTOR were 5' - GCAGATTTGCCAACTACC -3' and 5' - CACGGAGAACGAGGACA -3' . The PCR primers for GAPDH which used as endogenous control were 5' - GGTGAAGGTCGGTGTGAACG -3' and 5' - CTCGCTCCTGGAAGATGGTG -3' . Bar graphs showed the quantification of mRNA level of mTOR. Experiments were repeated at least three times. \*\*P<0.01 V.S. control group, \*P<0.05 V.S. control group; ##P<0.01 V.S. ox-LDL group, #P<0.05 V.S. ox-LDL group; \$\$P <0.01 V.S.BBR group.
